# Supplementary material for: Insertion of CO 2 to 2-methyl furoate promoted by a cobalt hypercrosslinked polymer catalyst to obtain a monomer of CO 2 -based biopolyesters
Source: Royal Society of Chemistry journal article supplement (doi:10.1039/d4su00426d), 2024-01-01
Supplement: d4su00426d1.pdf [file d4su00426d1.pdf]

## Supporting Information

### Insertion of CO<sub>2</sub> to 2-methyl furoate promoted by a cobalt hypercrosslinked polymer catalyst to obtain a monomer of CO<sub>2</sub>-based biopolyesters

Elizabeth Rangel-Rangel,<sup>a</sup> Betariz Fuerte-Díez,<sup>a</sup> Marta Iglesias<sup>a</sup> and Eva M. Maya<sup>\*a</sup>

<sup>a</sup> Instituto de Ciencia de Materiales de Madrid (ICMM-CSIC), Sor Juana Inés de la Cruz, 3,  
Cantoblanco. Madrid 28049, Spain.

[eva.maya@csic.es](mailto:eva.maya@csic.es)

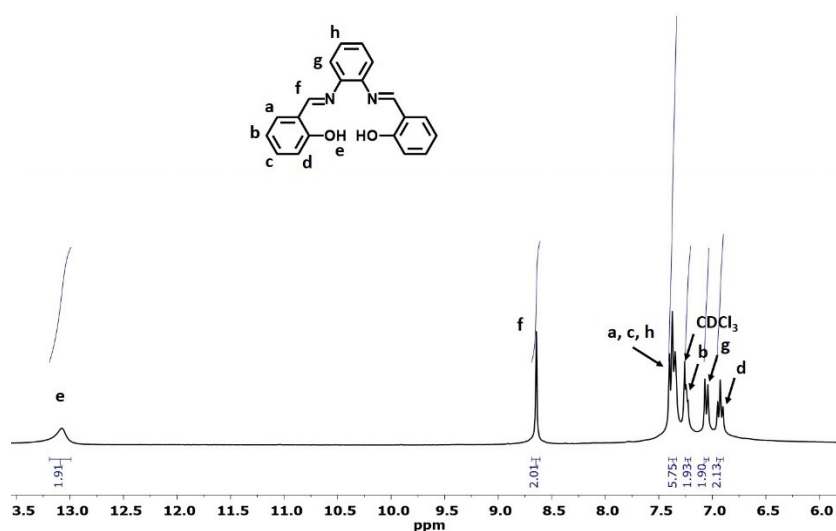

**Figure S1.** <sup>1</sup>H-NMR of N,N'-phenylenebis(salicylideneimine) (salphen)

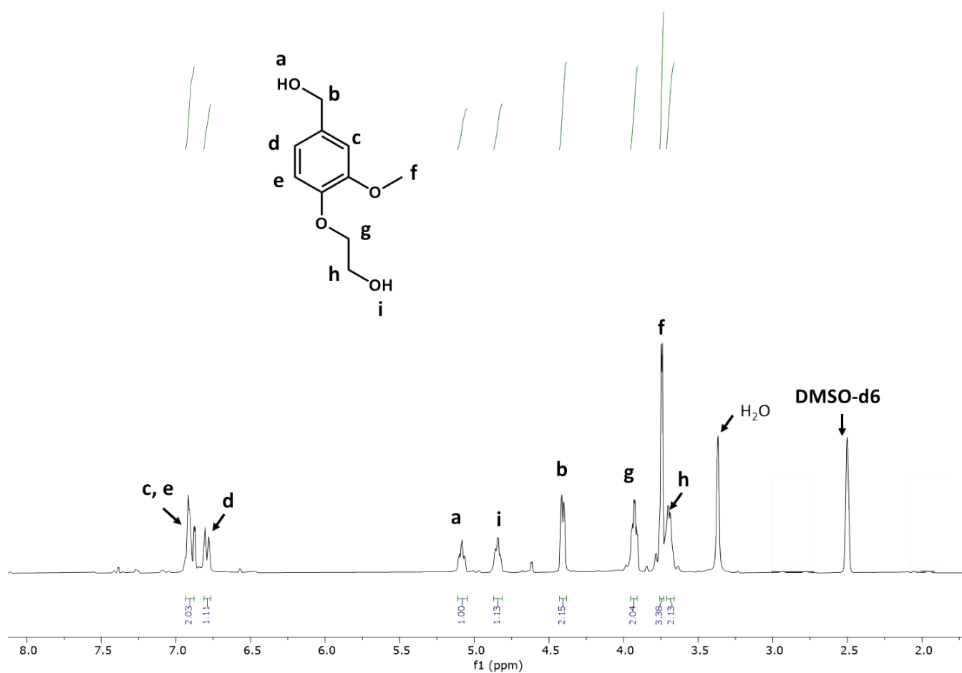

Figure S2. <sup>1</sup>H-NMR of 2-(4-(Hydroxymethyl)-2-methoxyphenoxy)ethanol (Va-Diol)

| Seq. No.   | 6                | AS Loc:       | 14            | Date:           | 2023/04/10 12:10:55 |
|------------|------------------|---------------|---------------|-----------------|---------------------|
| Sample ID: | HCP-SalphenCo(I) |               |               |                 |                     |
| Analyte    | Conc (Calib)     | Conc (Sample) | Net Intensity | Corr. Intensity | Time                |
| Co 228.616 | 35.73 mg/L       | 35.73 mg/L    |               | 1.616.484,9     | 2023/04/10 12:10:45 |
|            | 35.32 mg/L       | 35.32 mg/L    | 1.598.226,8   | 1.598.204,0     | 2023/04/10 12:10:50 |
|            | 35.05 mg/L       | 35.05 mg/L    | 1.586.465,0   | 1.586.442,2     | 2023/04/10 12:10:55 |
| Mean:      | 35.37 mg/L       | 35.37 mg/L    |               | 1.600.377,0     |                     |
| SD:        | 0.342 mg/L       | 0.342 mg/L    |               |                 |                     |
| %RSD:      | 0,97             |               |               |                 |                     |

Figure S3. ICP analysis of HCP-Salphen-Co

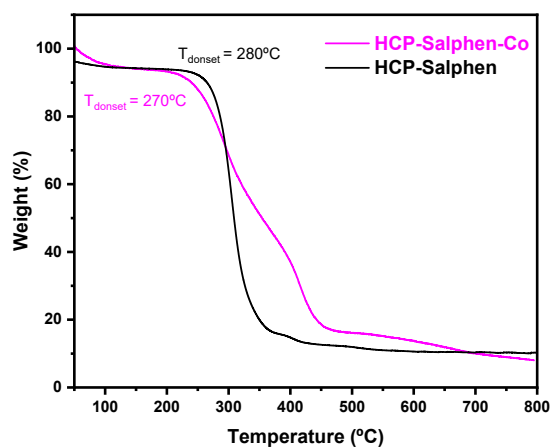

Figure S4. TGA of HCP-Salphen-Co and HCP-Salphen

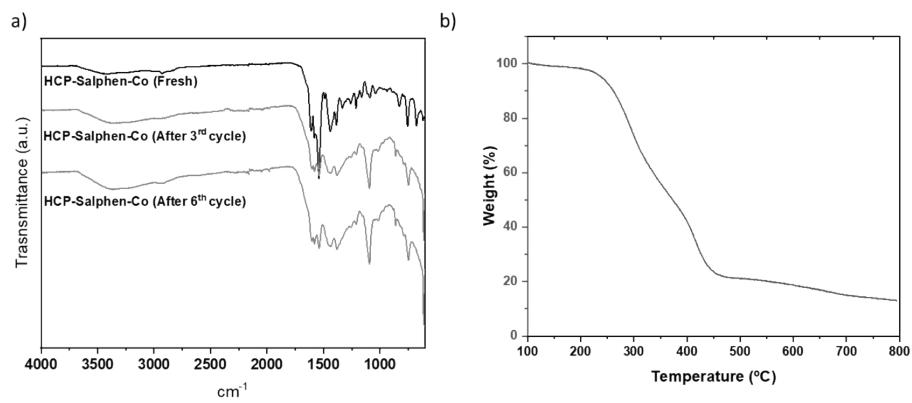

**Figure S5.** a) FTIR and b) TGA of recycled HCP-Salphen-Co

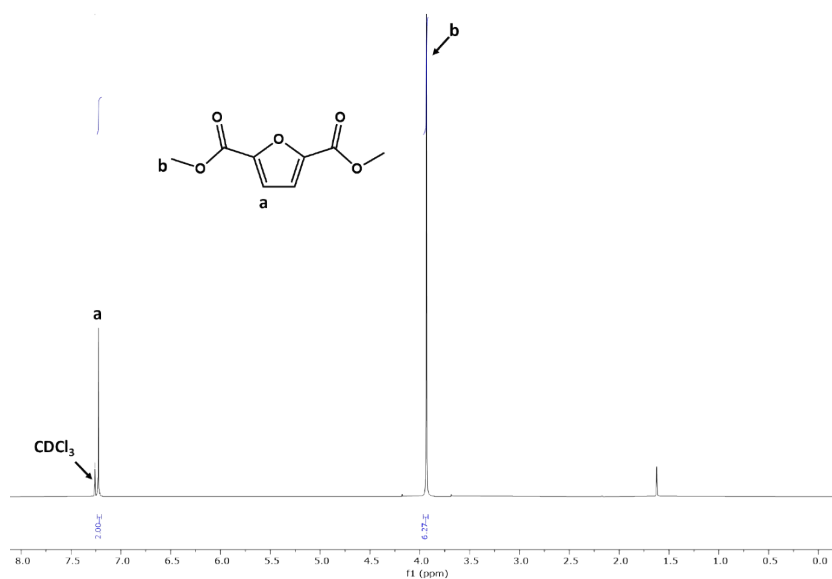

**Figure S6.** <sup>1</sup>H-NMR of commercial FDME

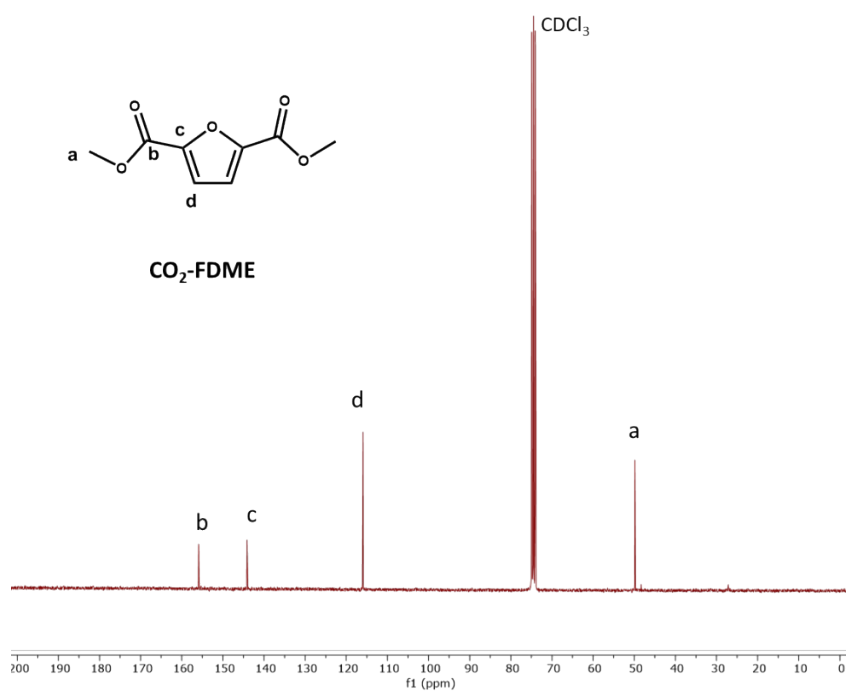

Figure S7.  $^{13}\text{C}$ -NMR of  $\text{CO}_2\text{-FDME}$

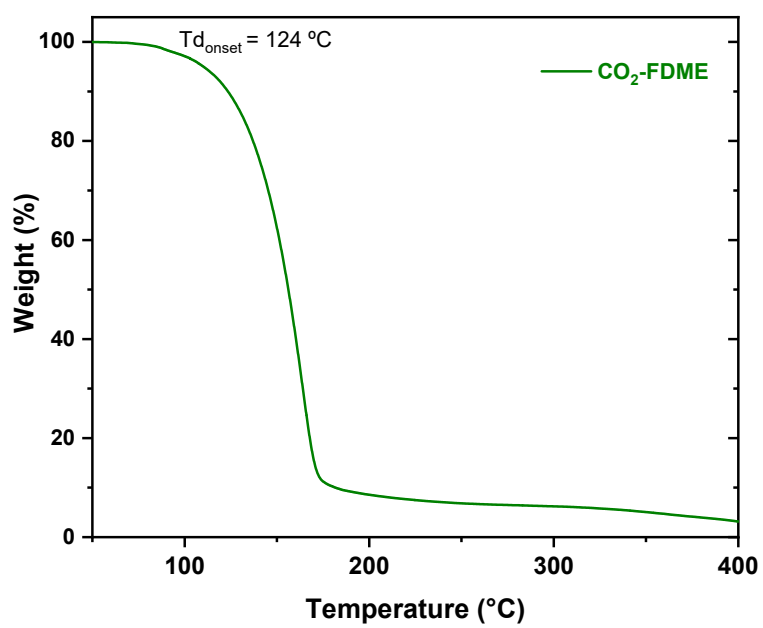

Figure S8. TGA of  $\text{CO}_2\text{-FDME}$

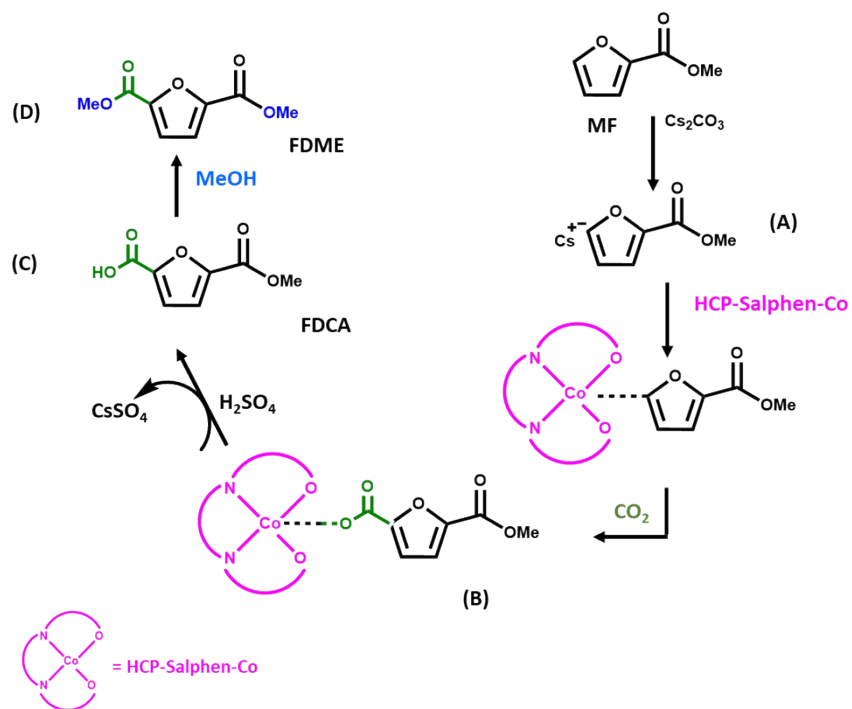

**Figure S9.** Proposed mechanism for the conversion of methyl furoate (MF) into furfural dimethyl ester (FDME)

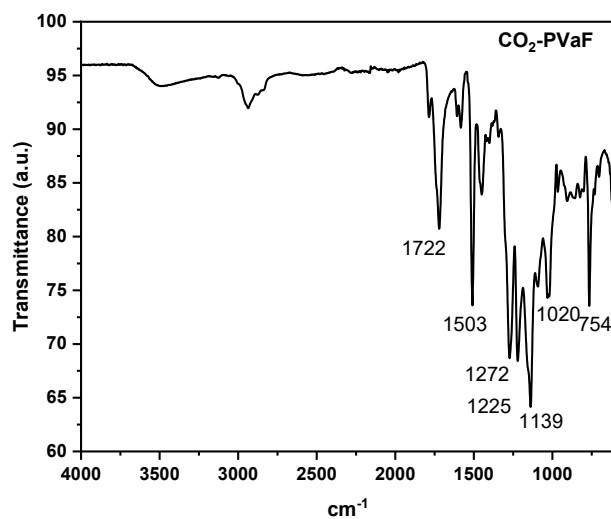

**Figure S10.** FT-IR spectrum of  $\text{CO}_2\text{-PVaF}$

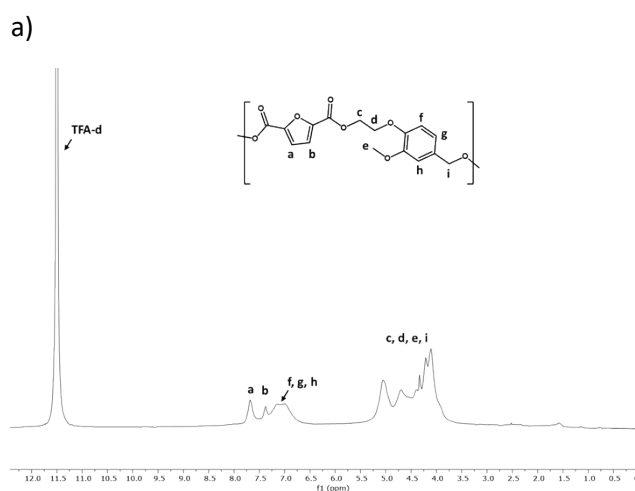

**Figure S11.**  $^1\text{H-NMR}$  of  $\text{CO}_2\text{-PVaF}$

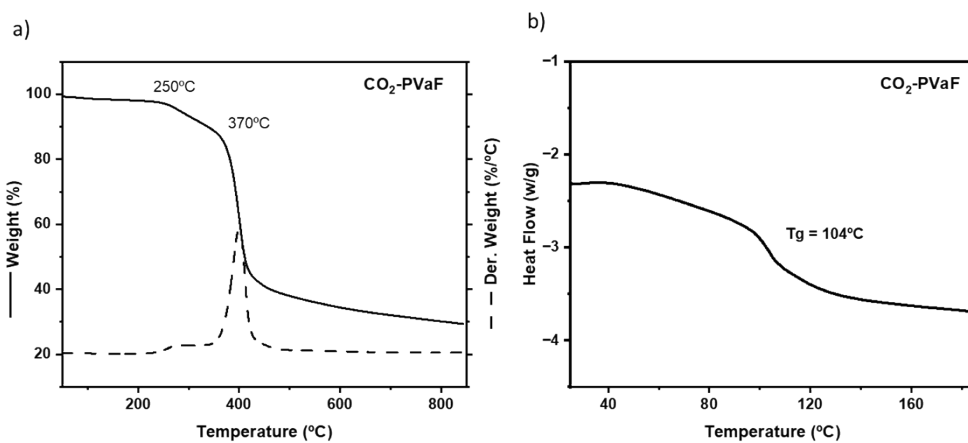

**Figure S12.** Thermal properties of  $\text{CO}_2\text{-PVaF}$ : a) Thermogravimetric analysis (TGA) and b) Differential scanning calorimetry (DSC)
